# Supplementary material
Source: PubMed Central journal article supplement (PMC4559189)

### N-terminal Region Peptide

(YGSSSNTRVLNELNYDNAGTNLYNELEMNYYGKQENWYSLKKNRSRLGENDDGNNEDNEKLRKPKHKKLKQPADHHHHH)

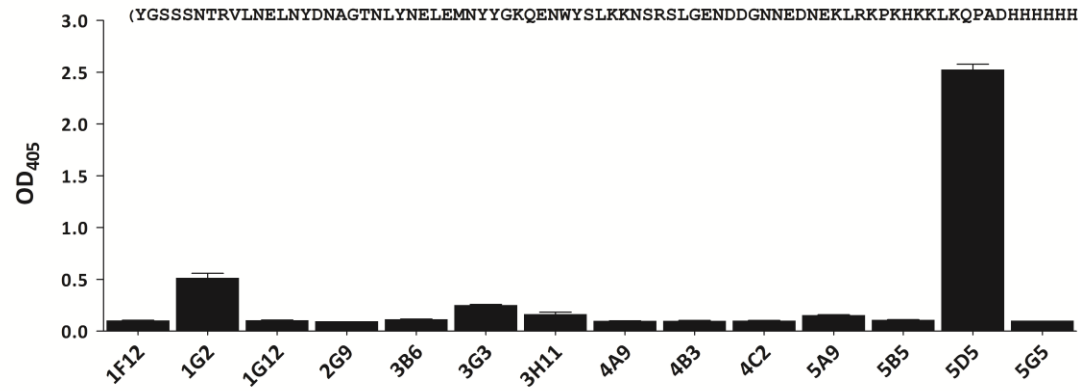

### Repeat Region Peptide

(CNVDPNANPNVDENANPNANPNA)

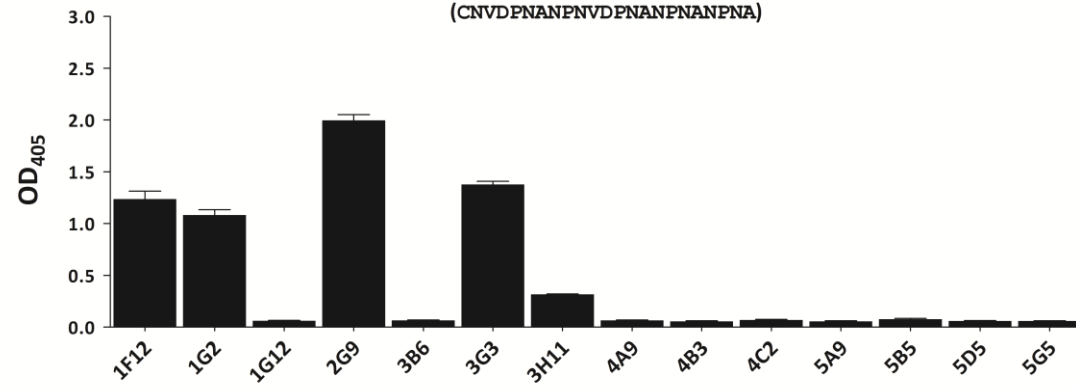

### C-Terminal Region Peptide

(GIQVRIKPGSANKPKDELVDYANDIEKKICKMEKCSSVFNVVNSSIGLIMVLSFLFLNHHHHH)

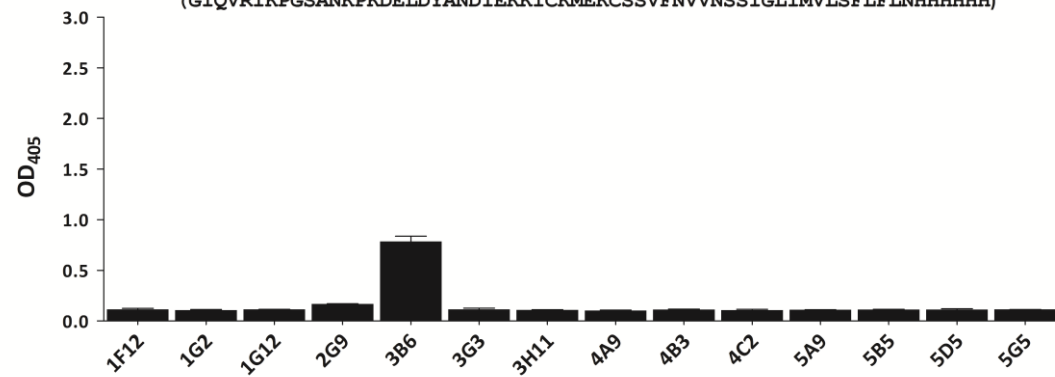

Supplement: supp_jiv154_jiv154supp_fig1.pdf [file supp_jiv154_jiv154supp_fig1.pdf]
